# Supplementary material
Source: Springer Nature journal article supplement (https://www.springermedizin.de/resource/supplementary/12937_2010_360_MOESM1_ESM.pdf/25653212)

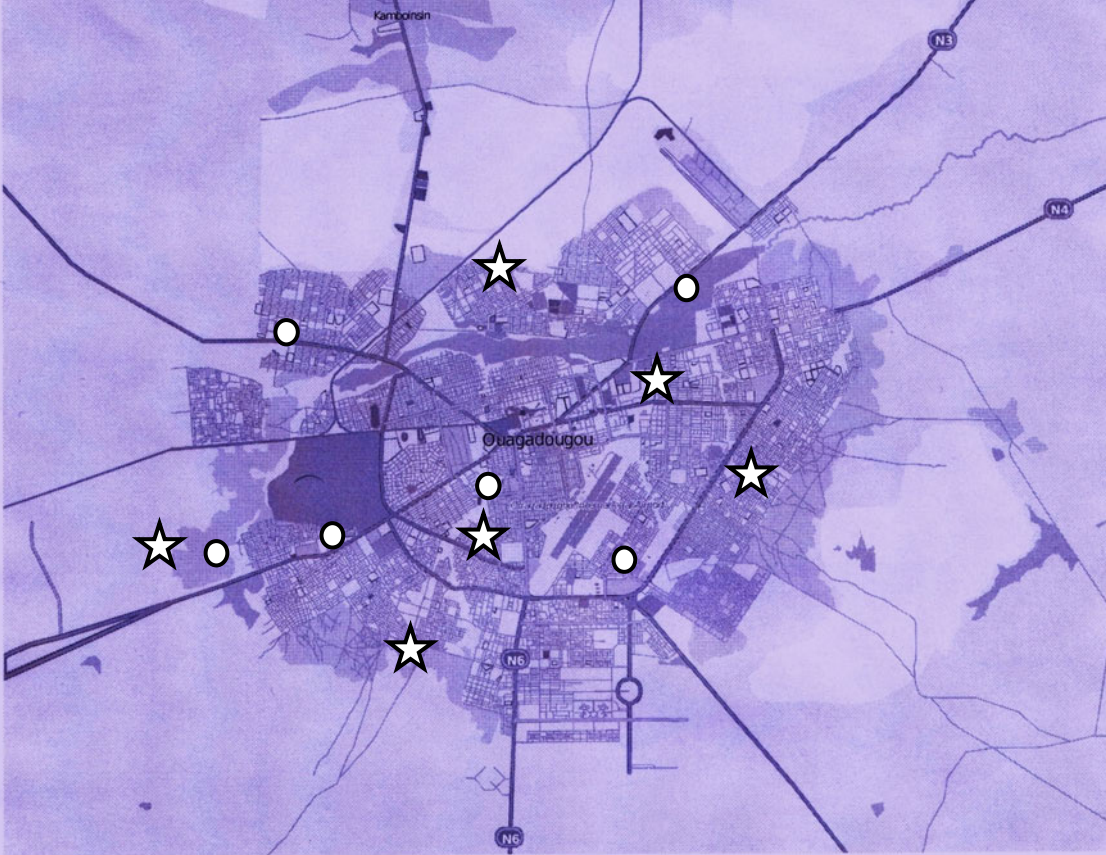

Kamboarsin

N3

N4

Ouagadougou

N6

N6

Supplement: MOESM1 [file 25653212]
